# Supplementary material for: Partial Rescue of F508del-CFTR Stability and Trafficking Defects by Double Corrector Treatment
Source: MDPI journal article supplement (doi:10.3390/ijms22105262), 2021-05-17

Fig 4A IP:CFTR – WB CFTR

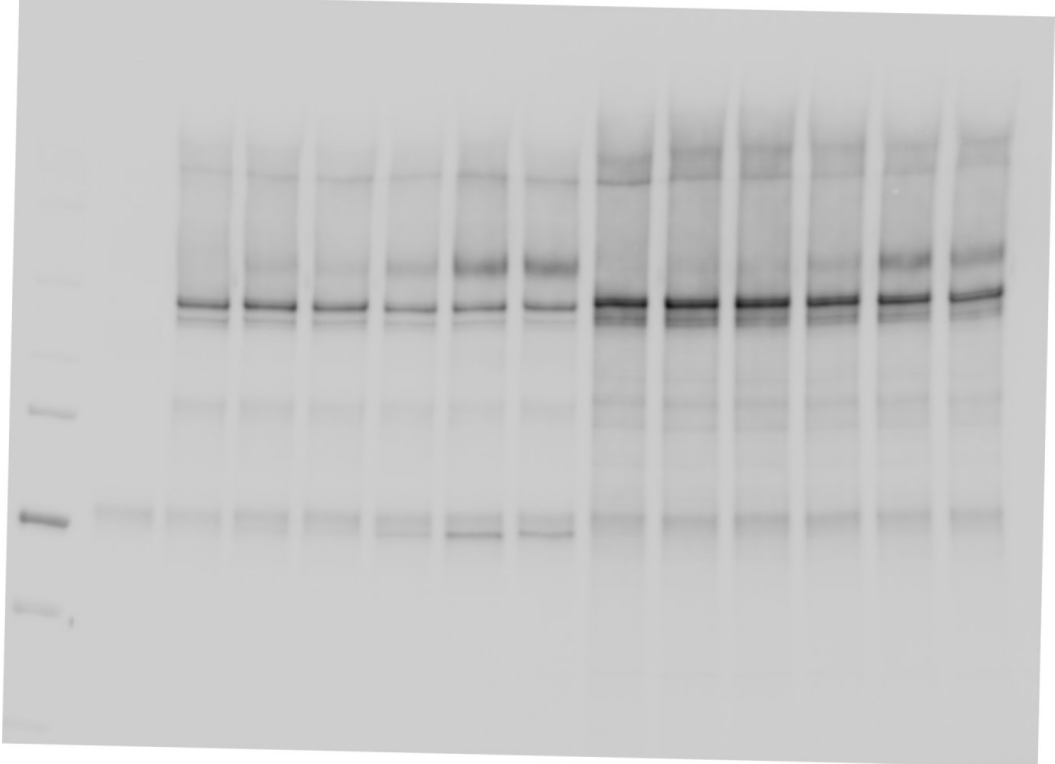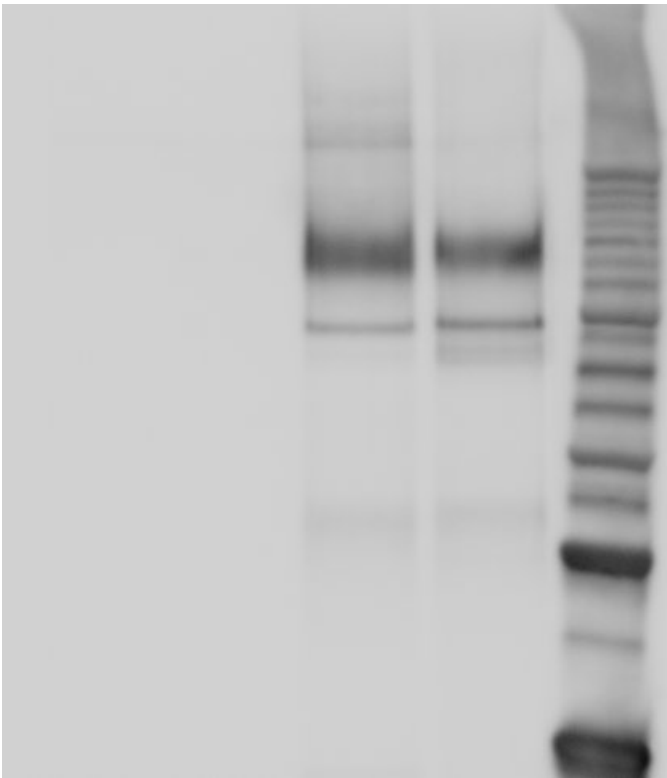

Fig 4A IP:CFTR – WB Ub

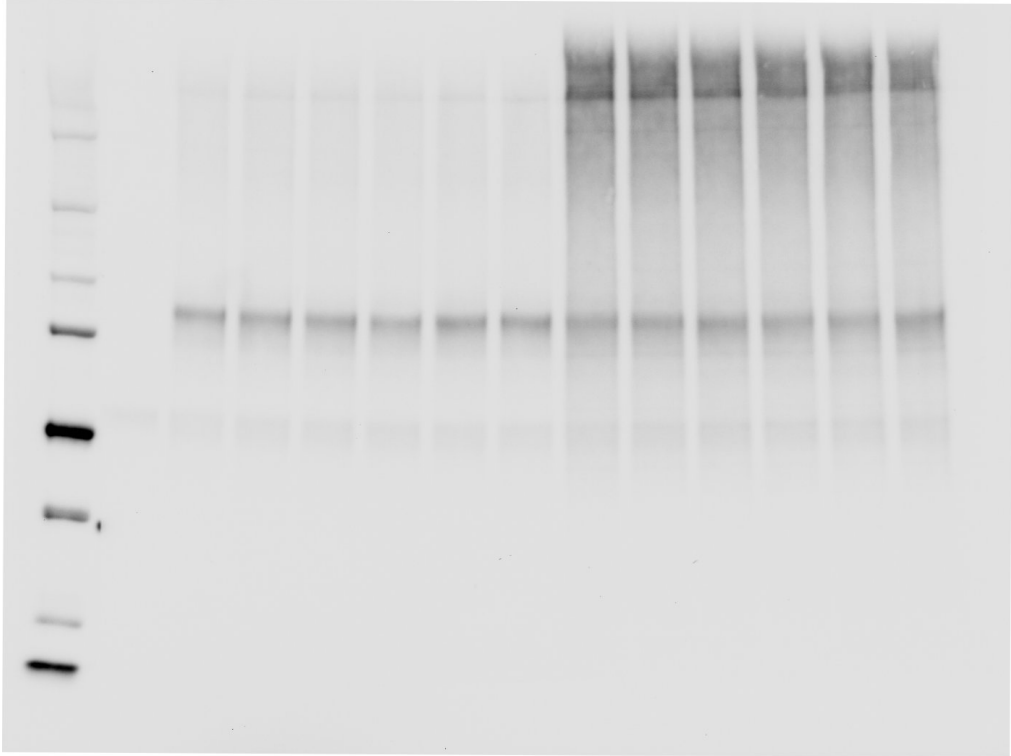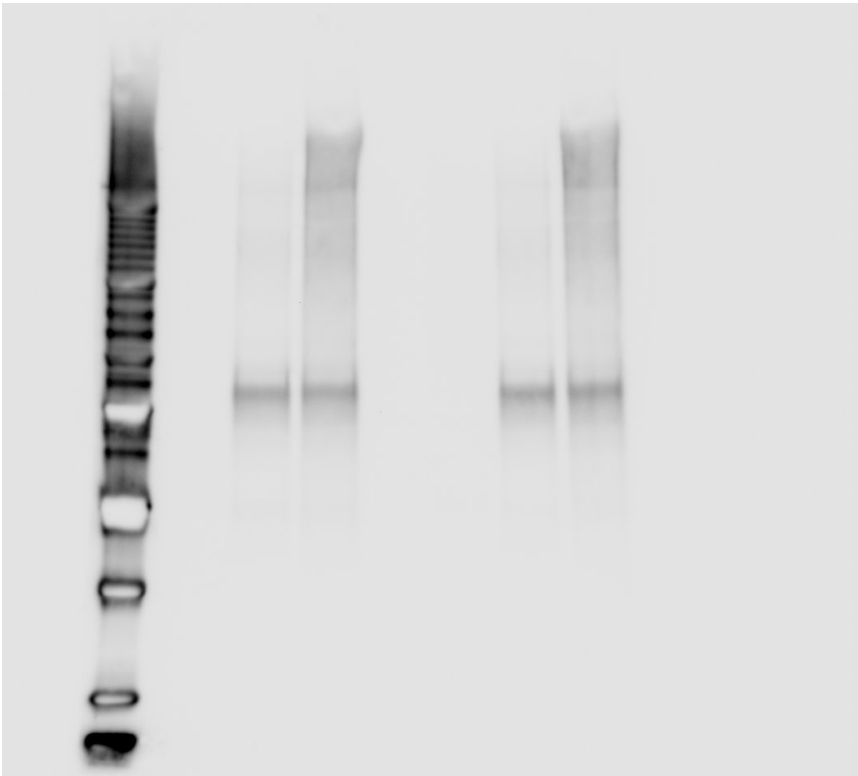

Fig 4A Whole Lysates – WB CFTR/GAPDH

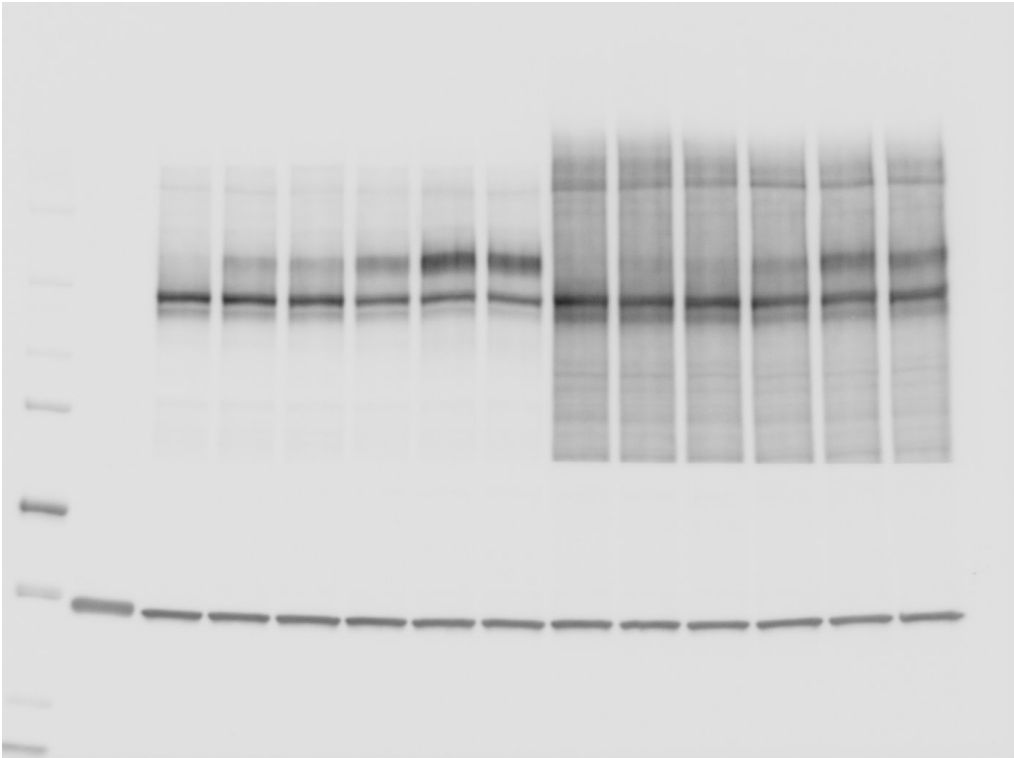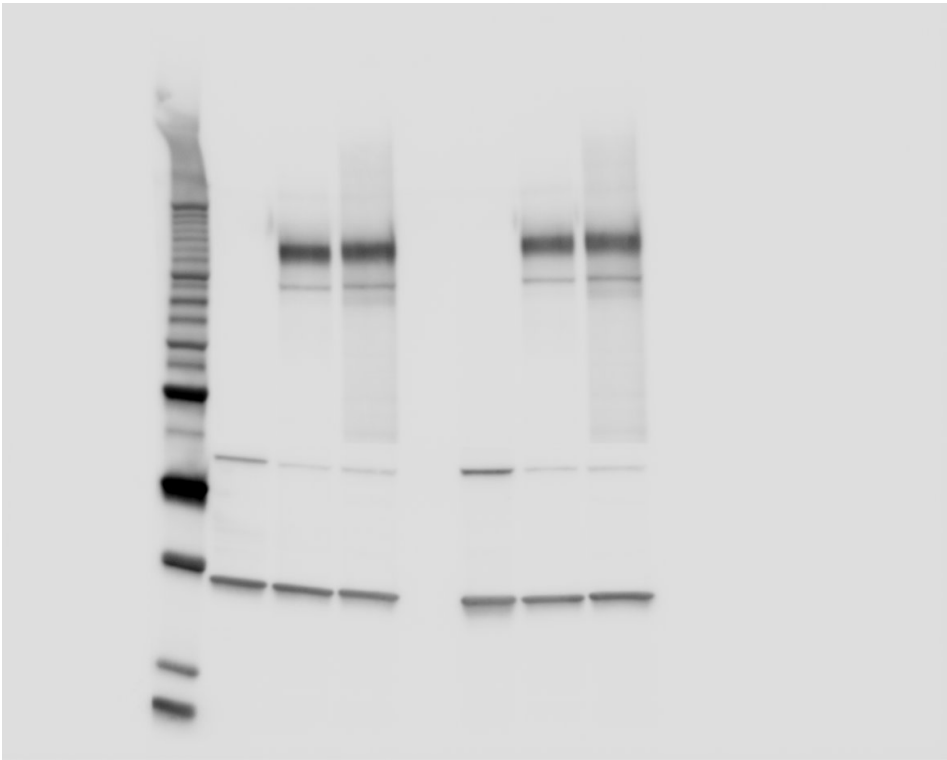

Fig 4A Whole Lysates – WB Ub

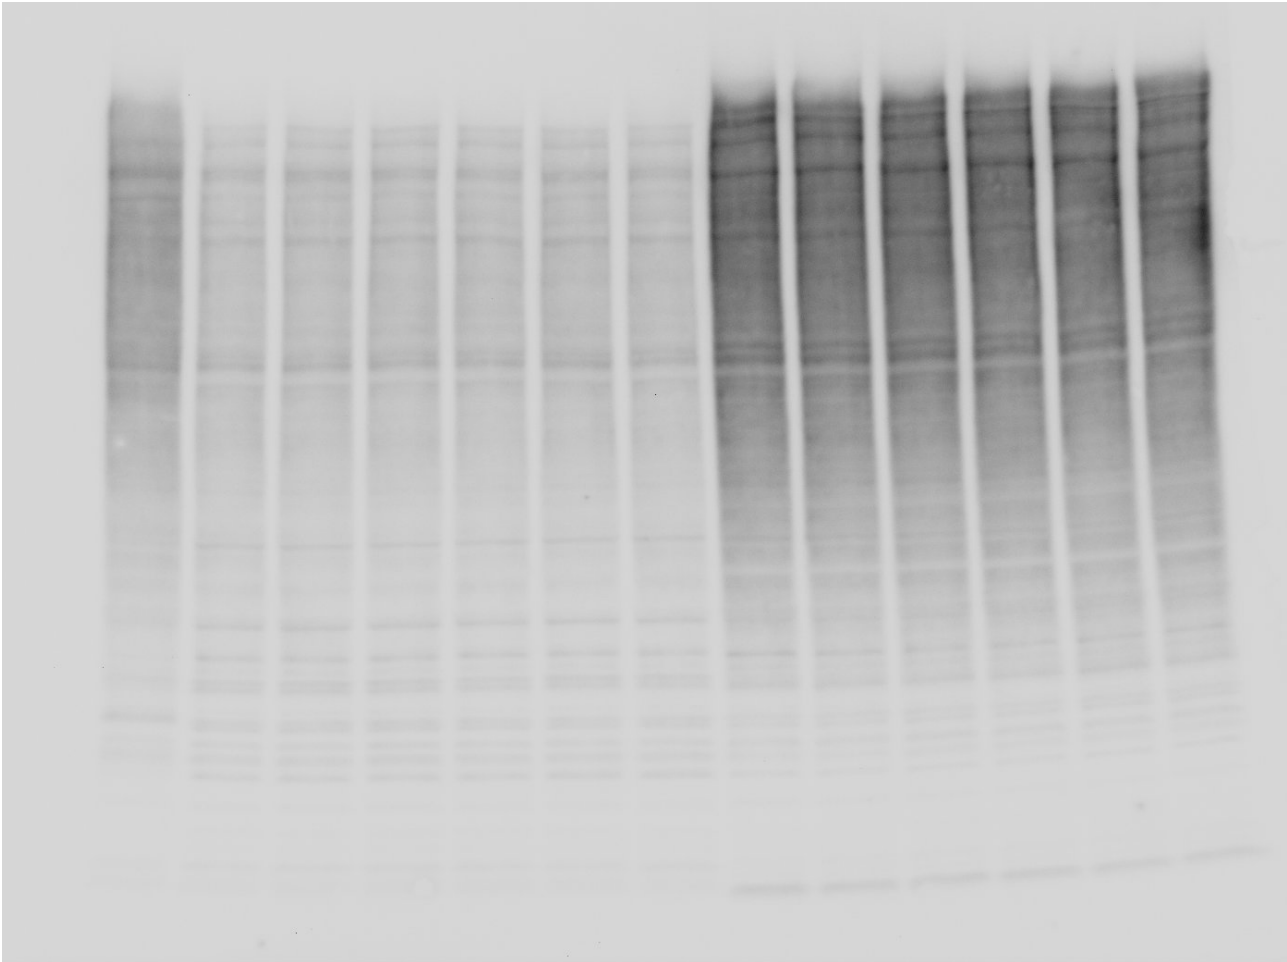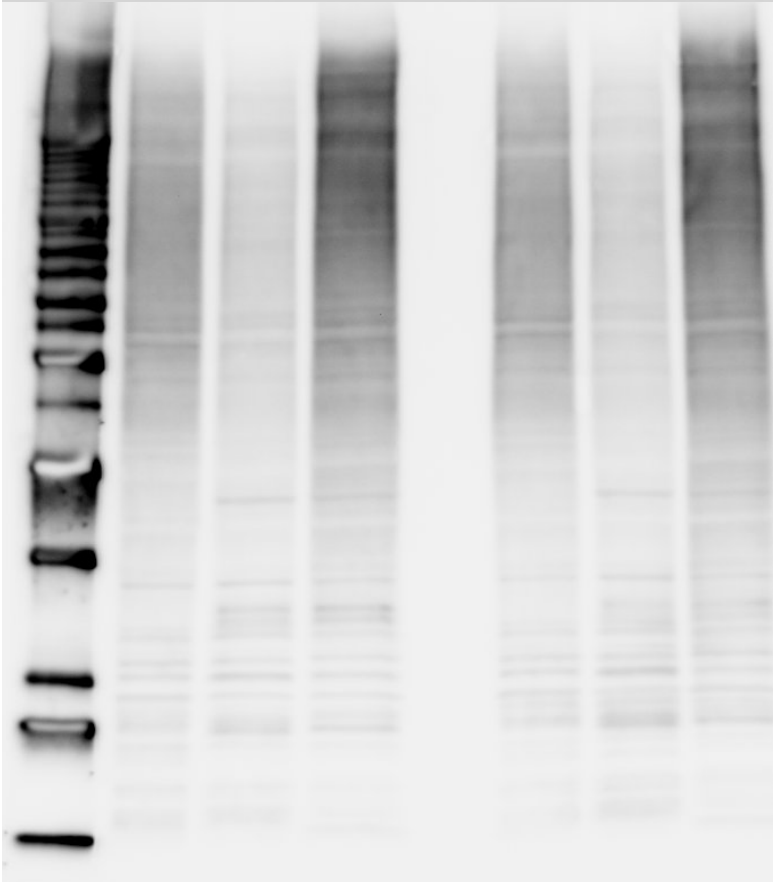

Fig 5A CHX chase

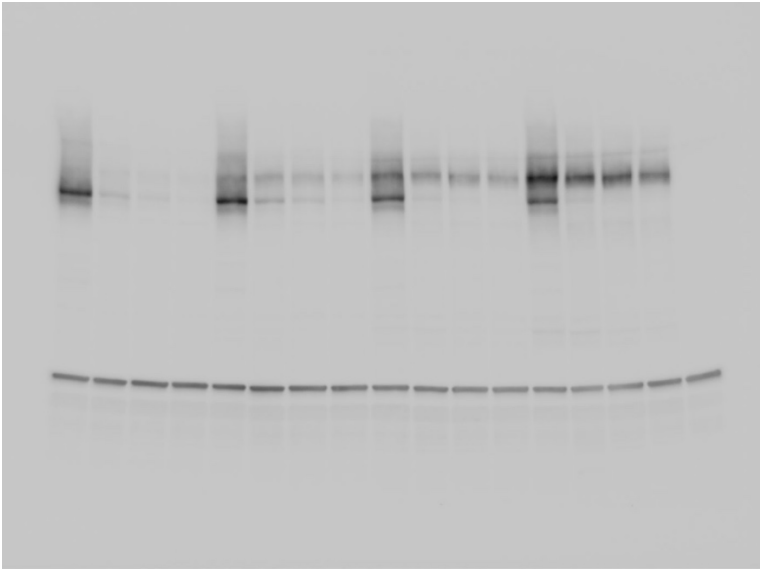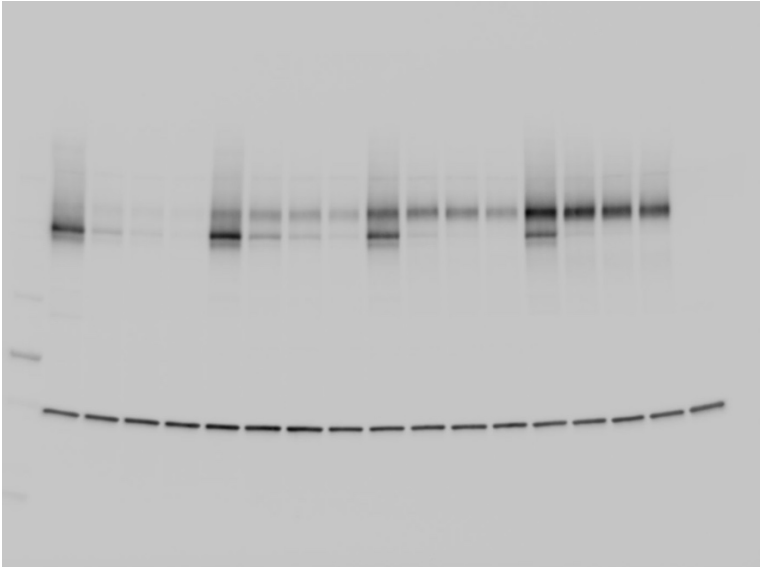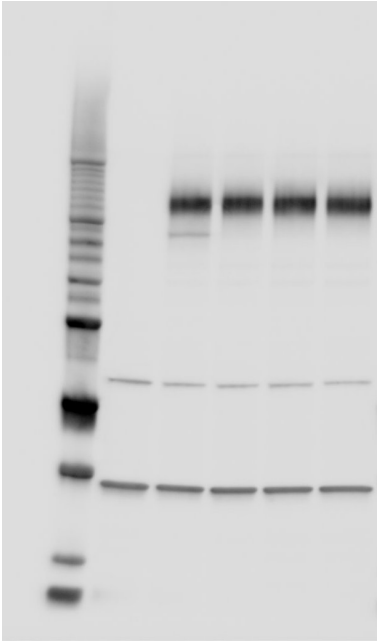

Fig 6A **Thermoaggregation assay**

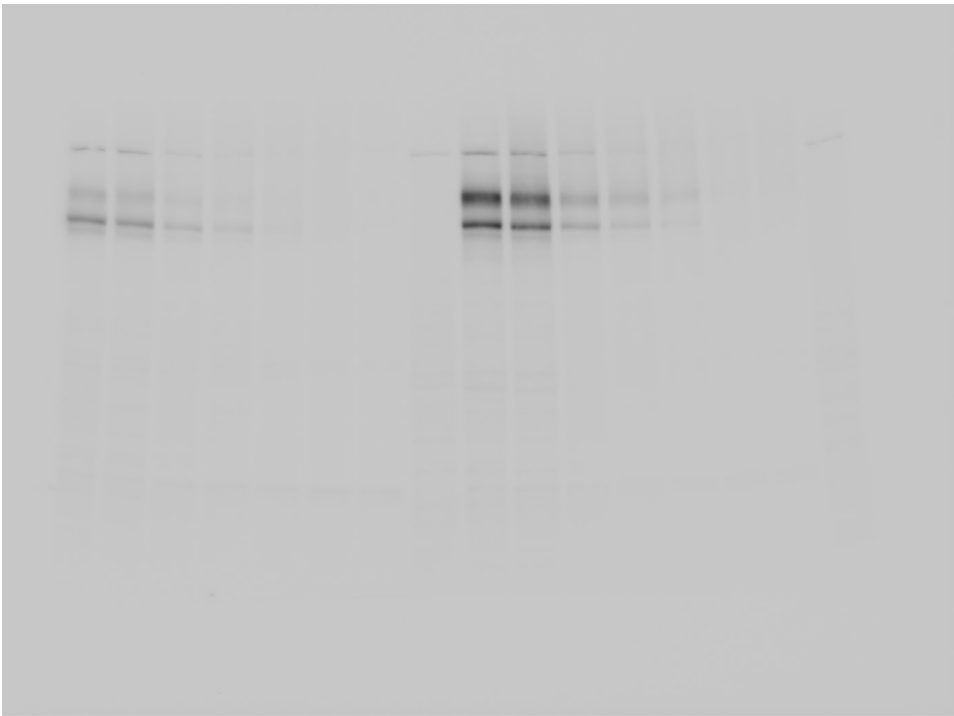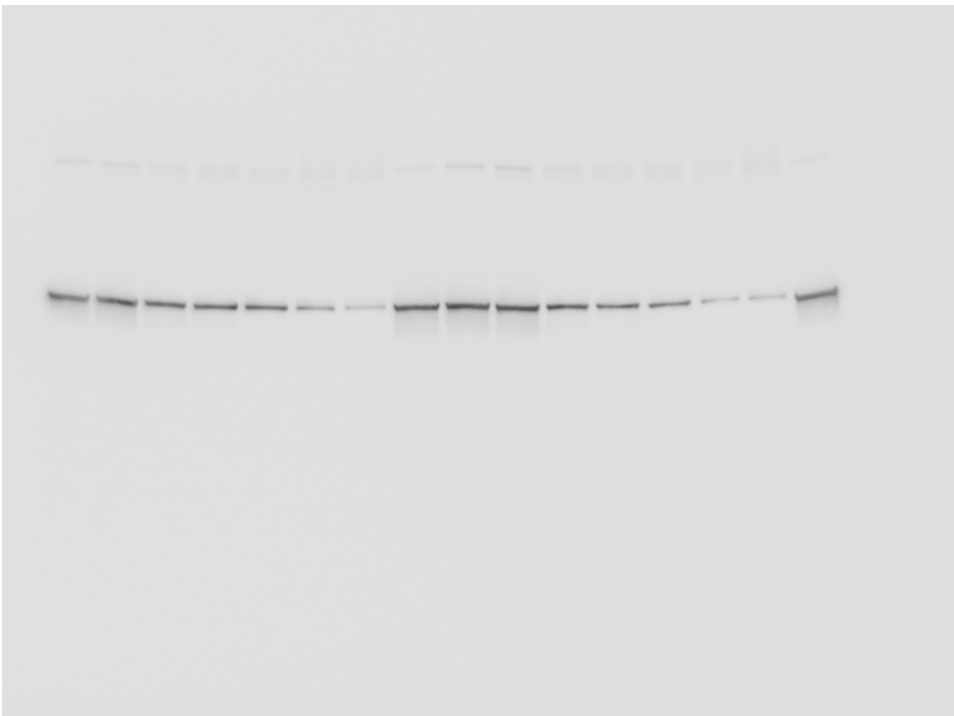

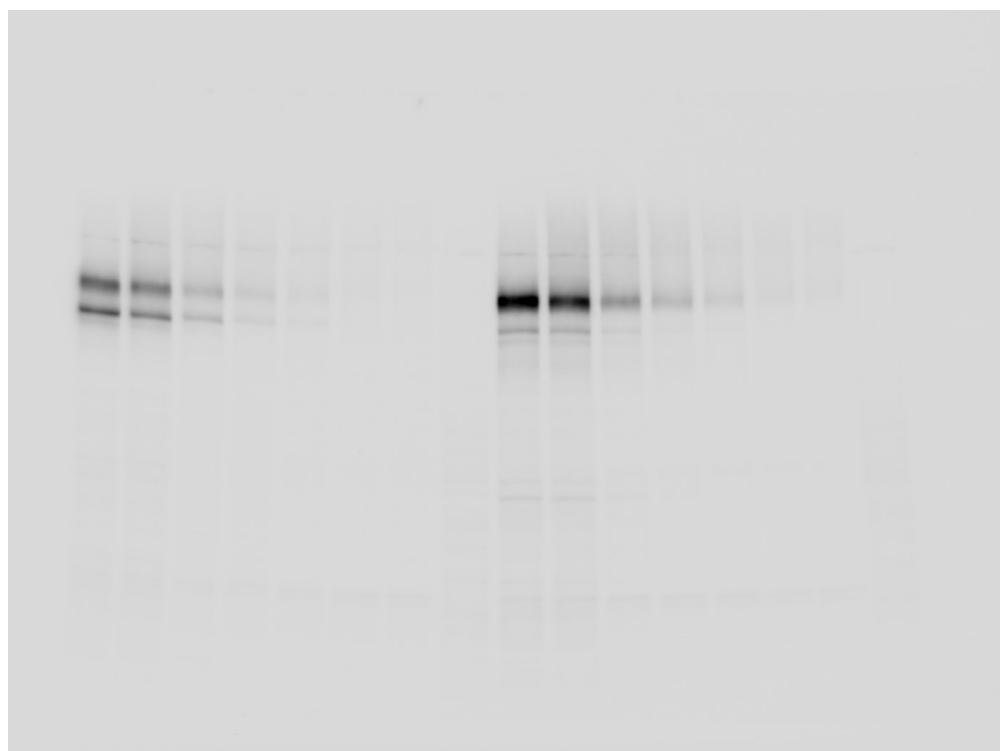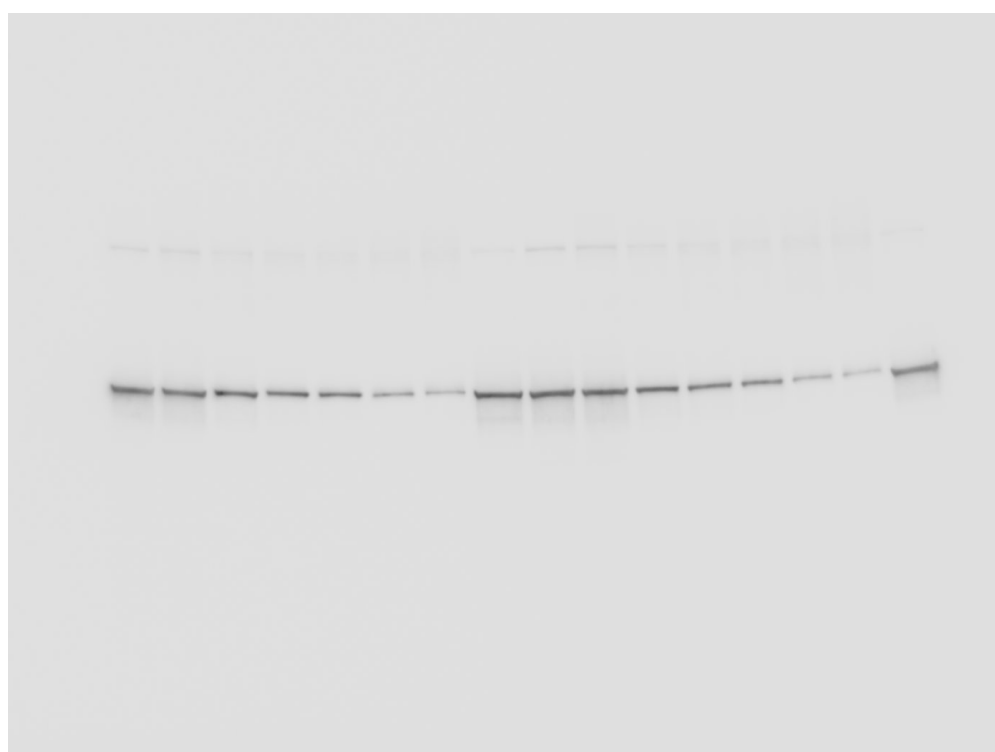

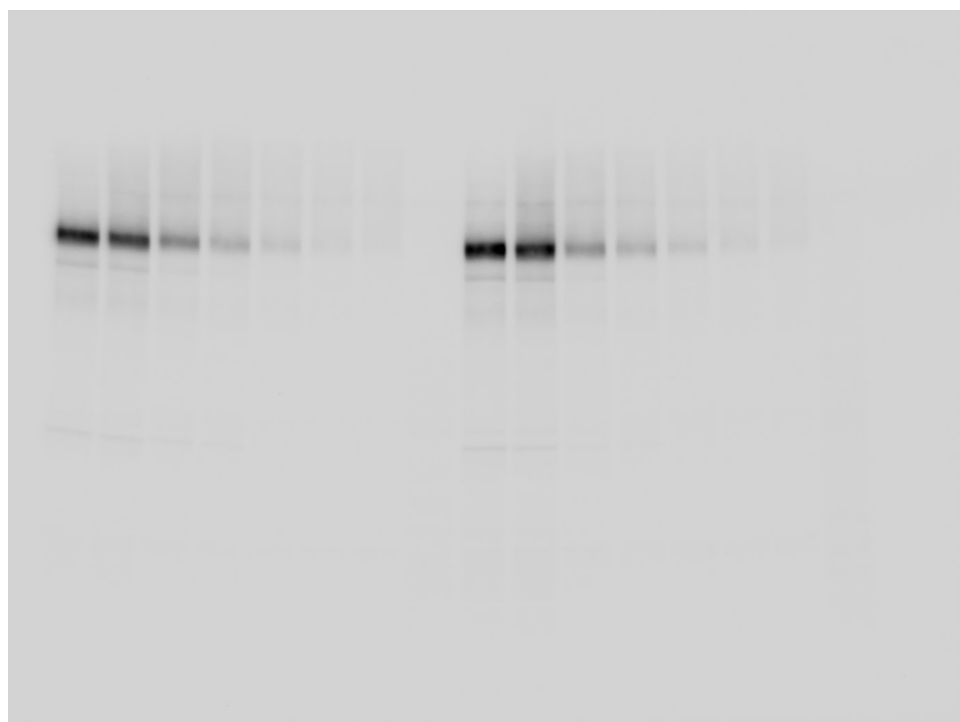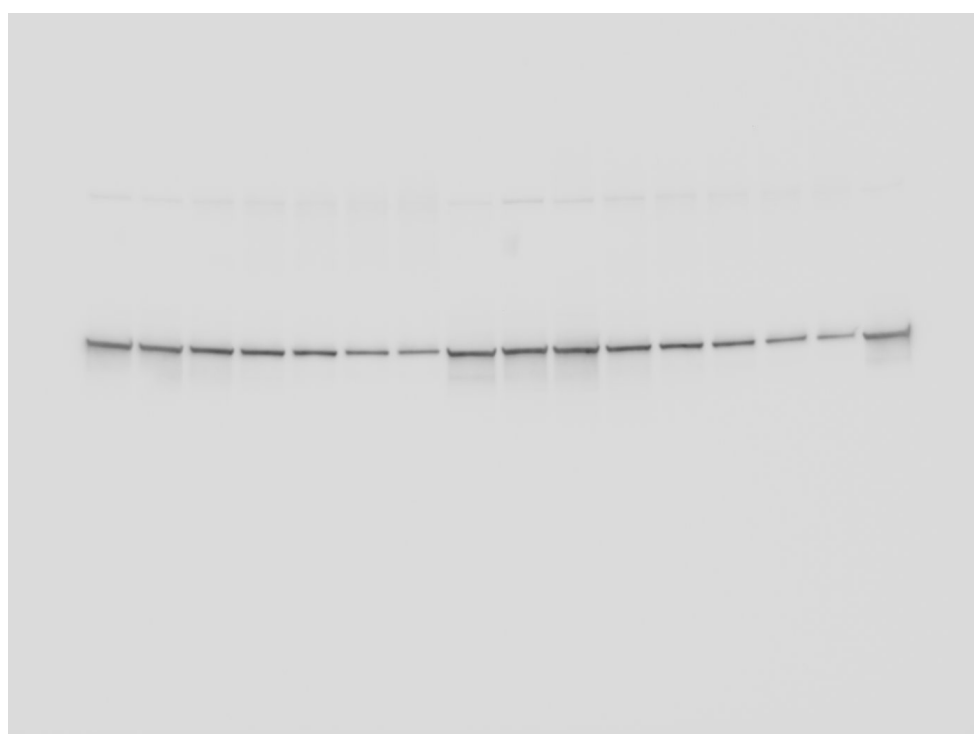



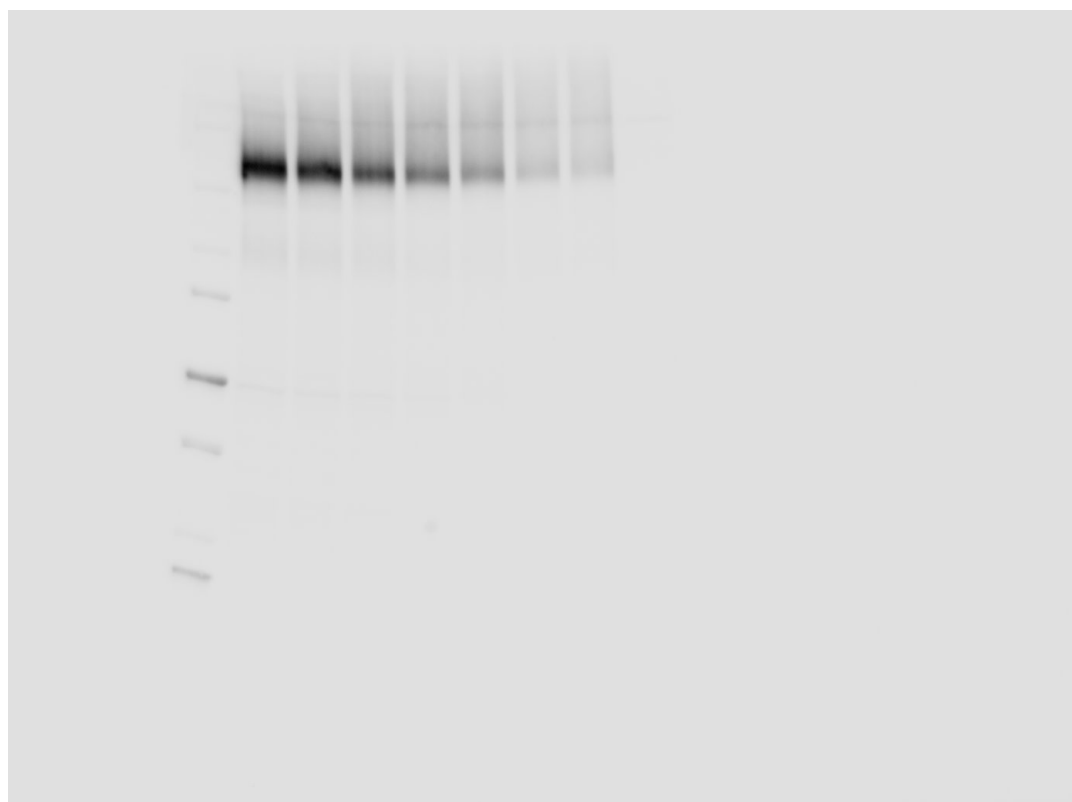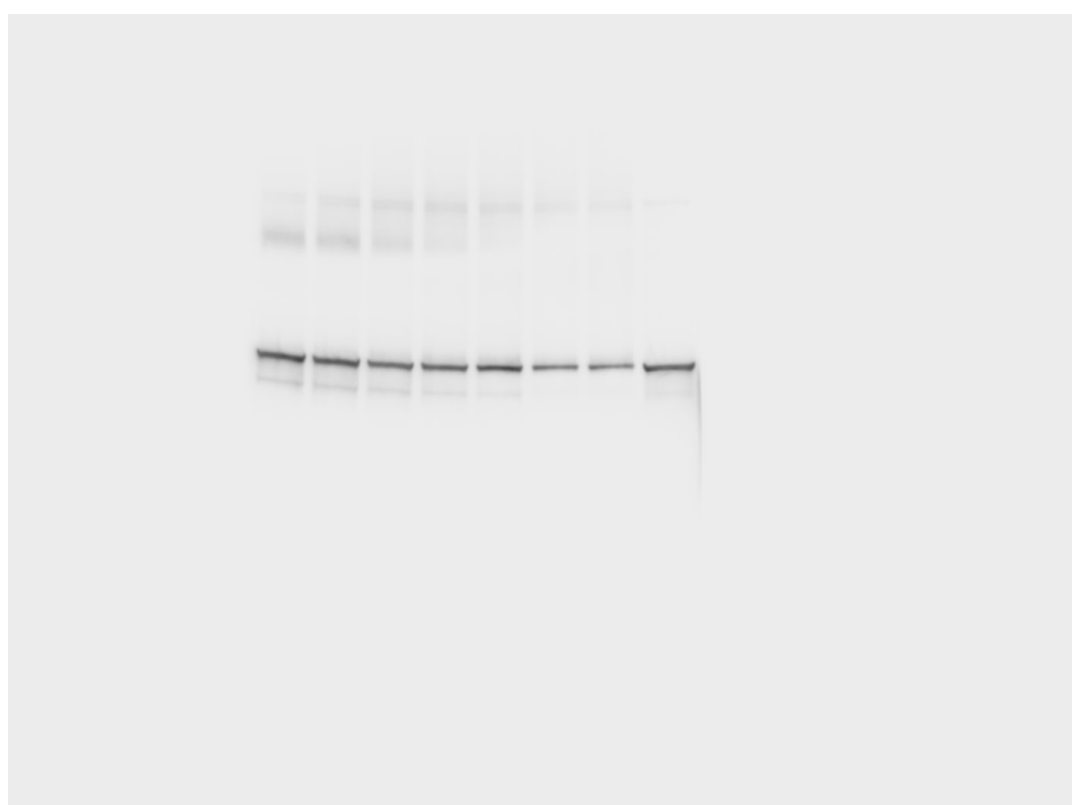

Supplement: s1 [file s1]
