# Supplementary material for: Partial Rescue of F508del-CFTR Stability and Trafficking Defects by Double Corrector Treatment
Source: Int J Mol Sci. 2021 May 17;22(10):5262. doi: 10.3390/ijms22105262 (PMC8156943; doi:10.3390/ijms22105262)
Supplement: Supplementary file 1 [file ijms-22-05262-s001.zip]

Archive with 4 entries (4 files):
- uncropped.pdf
- __MACOSX/._uncropped.pdf
- Suppl Info - CHEMISTRY.pdf
- __MACOSX/._Suppl Info - CHEMISTRY.pdf
